# Supplementary material
Source: MDPI journal article supplement (https://www.mdpi.com/2379-139X/8/5/207)
Supplement: s1 [file s1]

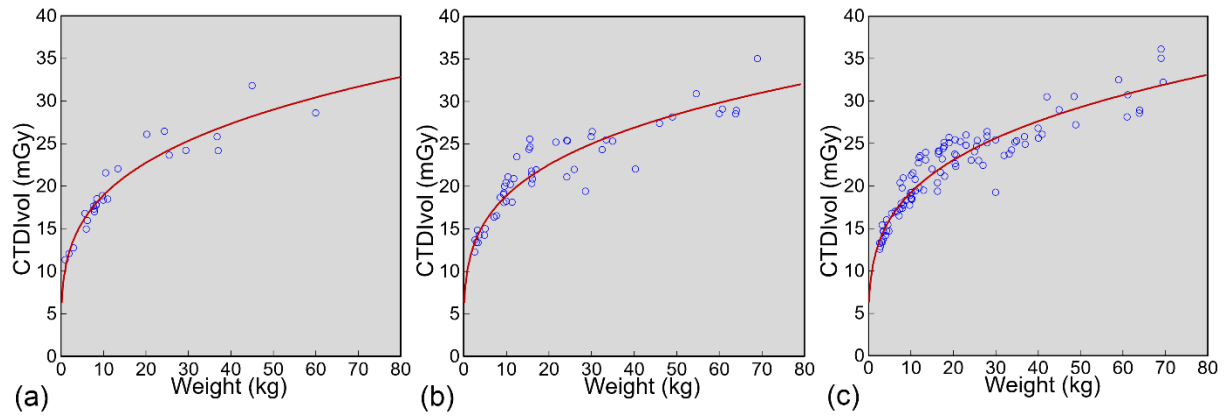

**Figure S1.** Examples of plots of CTDIvol against weight for small (a), medium (b), and large (c) datasets. Red curves indicate power functions fitted to the plots.

**Table S1.** Coefficients of determination between CTDIvol and age.

| Fitting method   | S                   | M                   | L                   |
|------------------|---------------------|---------------------|---------------------|
| Logarithmic      | 0.875 (0.683–0.936) | 0.875 (0.833–0.922) | 0.867 (0.830–0.908) |
| Power            | 0.903 (0.676–0.956) | 0.897 (0.864–0.939) | 0.896 (0.856–0.932) |
| Bilinear (young) | 0.904 (0.624–0.960) | 0.883 (0.797–0.964) | 0.886 (0.806–0.961) |
| Bilinear (old)   | 0.777 (0.465–0.910) | 0.751 (0.651–0.902) | 0.761 (0.661–0.830) |

Median values are presented with ranges in parenthesis.

**Table S2.** Coefficients of determination between CTDIvol and weight.

| Fitting method   | S                   | M                   | L                   |
|------------------|---------------------|---------------------|---------------------|
| Logarithmic      | 0.948 (0.724–0.973) | 0.945 (0.917–0.971) | 0.942 (0.914–0.962) |
| Power            | 0.945 (0.710–0.973) | 0.940 (0.896–0.973) | 0.940 (0.911–0.960) |
| Bilinear (light) | 0.930 (0.793–0.984) | 0.948 (0.840–0.971) | 0.923 (0.881–0.958) |
| Bilinear (heavy) | 0.803 (0.497–0.920) | 0.794 (0.575–0.899) | 0.781 (0.642–0.867) |
